# Supplementary material for: High-Density Linkage Maps from Japanese Rice japonica Recombinant Inbred Lines Using Genotyping by Random Amplicon Sequencing-Direct (GRAS-Di)
Source: MDPI journal article supplement (doi:10.3390/plants12040929), 2023-02-17
Supplement: s1 [file s1]

(A)

### 1) Creating a sequence library

A high concentration of random primers is used in PCR to amplify DNA fragments from the entire genome

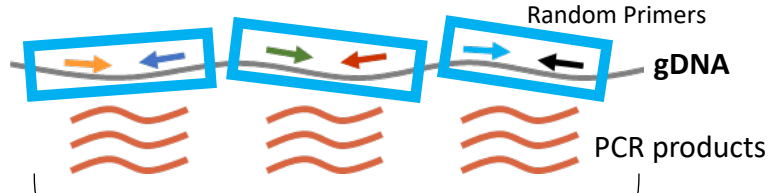

### 2) Sequence of PCR products using NGS platforms

About 1-fold the amount of rice genome was sequenced using HiSeq2500 NGS-platform (Illumina, Inc., San Diego, CA, USA)

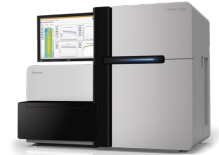

HiSeq2500 NGS-platform

### 3) Detection of DNA polymorphism

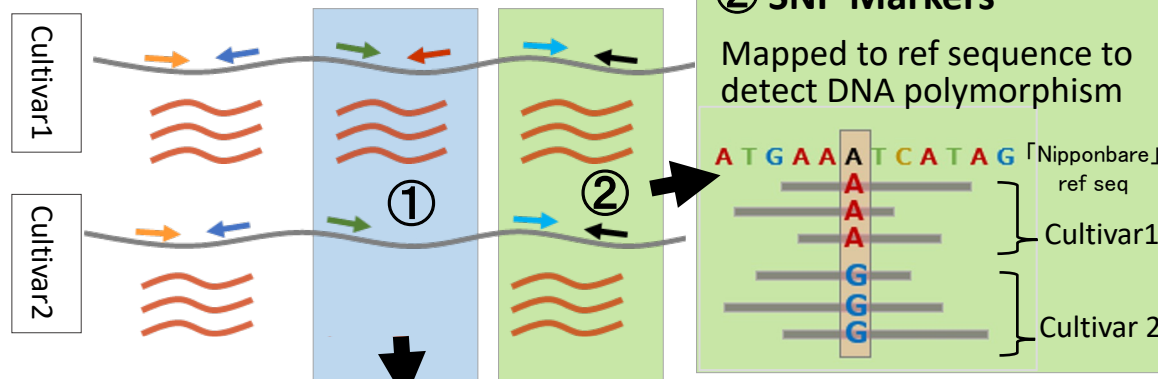

#### ① Amplicon markers

DNA polymorphism judged based on the presence/absence of specific amplification of sequences only in one parent variety.

#### ② SNP Markers

Mapped to ref sequence to detect DNA polymorphism

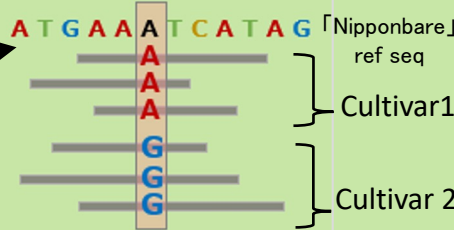

#### ① Amplicon markers:

▷ "GRAS-Di release version" [Toyota Motor Development]

#### ② SNP markers :

▷ Mapping to the Nipponbare reference seq (IRGSP-1.0) [bowtie2 (ver.2.3.3.1)]

▷ Detection of DNA polymorphism [samtools (ver.1.6) • bcftools (ver.1.6)]

▷ Genotype estimation [beagle (ver.4.0)]

▷ Kosambi's mapping function was used to convert recombination frequency to a genetic map distance (Kosambi, 1943). The R package R/qtl was used to display the linkage maps.

(B)

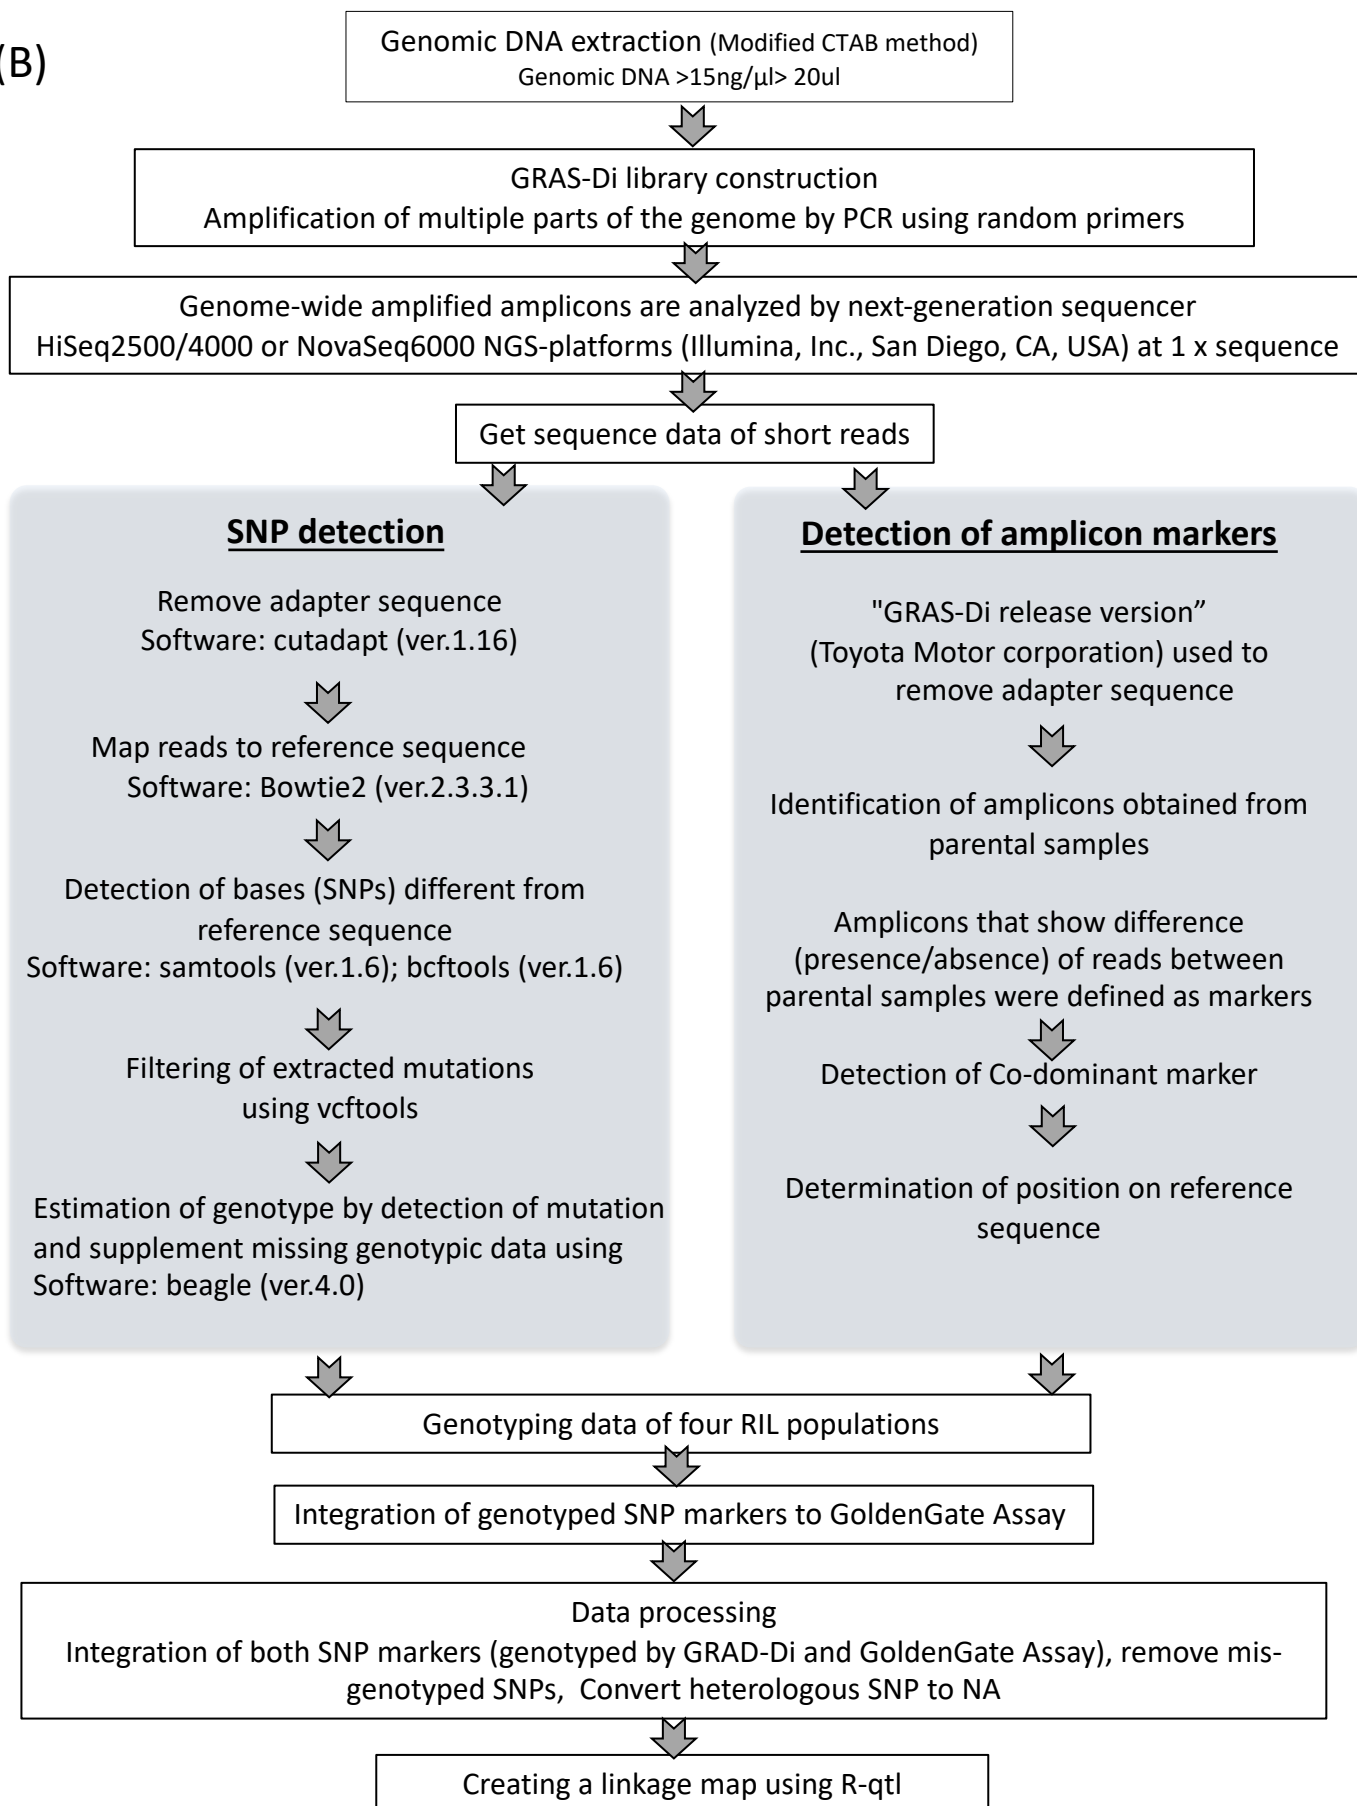

**Figure S1.** (A) Scheme summarizing the main steps for GRAS-Di library construction in this work . (B) Flow chart of main steps adopted for genotyping analysis and linkage mapping

**Table S1.** Primer sequences for the first PCR

| Primer Name | Primer Sequence (5'-3') |
|-------------|-------------------------|
| NE10_301    | TAAGAGACAGAAA           |
| NE10_302    | TAAGAGACAGAAC           |
| NE10_303    | TAAGAGACAGAAG           |
| NE10_304    | TAAGAGACAGAAT           |
| NE10_305    | TAAGAGACAGACA           |
| NE10_306    | TAAGAGACAGACC           |
| NE10_307    | TAAGAGACAGACG           |
| NE10_308    | TAAGAGACAGACT           |
| NE10_309    | TAAGAGACAGAGA           |
| NE10_310    | TAAGAGACAGAGC           |
| NE10_311    | TAAGAGACAGAGG           |
| NE10_312    | TAAGAGACAGAGT           |
| NE10_313    | TAAGAGACAGATA           |
| NE10_314    | TAAGAGACAGATC           |
| NE10_315    | TAAGAGACAGATG           |
| NE10_316    | TAAGAGACAGATT           |
| NE10_317    | TAAGAGACAGCAA           |
| NE10_318    | TAAGAGACAGCAC           |
| NE10_319    | TAAGAGACAGCAG           |
| NE10_320    | TAAGAGACAGCAT           |
| NE10_321    | TAAGAGACAGCCA           |
| NE10_322    | TAAGAGACAGCCC           |
| NE10_323    | TAAGAGACAGCCG           |
| NE10_324    | TAAGAGACAGCCT           |
| NE10_325    | TAAGAGACAGCGA           |
| NE10_326    | TAAGAGACAGCGC           |
| NE10_327    | TAAGAGACAGCGG           |
| NE10_328    | TAAGAGACAGCGT           |
| NE10_329    | TAAGAGACAGCTA           |
| NE10_330    | TAAGAGACAGCTC           |
| NE10_331    | TAAGAGACAGCTG           |
| NE10_332    | TAAGAGACAGCTT           |
| NE10_333    | TAAGAGACAGGAA           |
| NE10_334    | TAAGAGACAGGAC           |
| NE10_335    | TAAGAGACAGGAG           |
| NE10_336    | TAAGAGACAGGAT           |
| NE10_337    | TAAGAGACAGGCA           |
| NE10_338    | TAAGAGACAGGCC           |
| NE10_339    | TAAGAGACAGGCG           |
| NE10_340    | TAAGAGACAGGCT           |
| NE10_341    | TAAGAGACAGGGA           |
| NE10_342    | TAAGAGACAGGGC           |
| NE10_343    | TAAGAGACAGGGG           |
| NE10_344    | TAAGAGACAGGGT           |
| NE10_345    | TAAGAGACAGGTA           |
| NE10_346    | TAAGAGACAGGTC           |
| NE10_347    | TAAGAGACAGGTG           |
| NE10_348    | TAAGAGACAGGTT           |
| NE10_349    | TAAGAGACAGTAA           |
| NE10_350    | TAAGAGACAGTAC           |
| NE10_351    | TAAGAGACAGTAG           |
| NE10_352    | TAAGAGACAGTAT           |
| NE10_353    | TAAGAGACAGTCA           |
| NE10_354    | TAAGAGACAGTCC           |
| NE10_355    | TAAGAGACAGTCG           |
| NE10_356    | TAAGAGACAGTCT           |
| NE10_357    | TAAGAGACAGTGA           |
| NE10_359    | TAAGAGACAGTGG           |
| NE10_360    | TAAGAGACAGTGT           |
| NE10_361    | TAAGAGACAGTTA           |
| NE10_362    | TAAGAGACAGTTC           |
| NE10_363    | TAAGAGACAGTTG           |
| NE10_364    | TAAGAGACAGTTT           |

**Table S2.** Primer sequences for the second PCR

| GRAS-Di library construct (Illumina Nextera adapter sequence used)                                                                                                                                         |                                                                                 |  |  |  |                |               |                                                                                |  |  |                |
|------------------------------------------------------------------------------------------------------------------------------------------------------------------------------------------------------------|---------------------------------------------------------------------------------|--|--|--|----------------|---------------|--------------------------------------------------------------------------------|--|--|----------------|
| (P5 side) 5'-AATGATACGGCACCACCGAGATCTACAC[P5 index sequence(below)]TCGTCGGCAGCGTCAGATGTGTATAAGAGACAG[Insert]CTGTCTCTTATACATCTCCGAGCCACGAGAC[P7 index sequence(below)]ATCTCGTATGCCGCTCTTCTGTTG-3' (P7 side) |                                                                                 |  |  |  |                |               |                                                                                |  |  |                |
| P5 Index Name                                                                                                                                                                                              | Index Primer Sequence (5'-3')                                                   |  |  |  | Index Sequence | P7 Index Name | Index Primer Sequence (5'-3')                                                  |  |  | Index Sequence |
| P5_0001                                                                                                                                                                                                    | AATGATACGGCACCACCGAGATCTACAC <b>CGCGCAGAT</b> CGTCGGCAGCGTCAGATGTGTATAAGAGACAG  |  |  |  | CGCGCAGA       | P7_0001       | CAAGCAGAAGACGGCATAACGAGAT <b>TCGTACAG</b> AGTCTCGTGGGCTCGGAGATGTGTATAAGAGACAG  |  |  | TCTGACGA       |
| P5_0002                                                                                                                                                                                                    | AATGATACGGCACCACCGAGATCTACAC <b>CGTCAGCAT</b> CTCGCGCAGCGTCAGATGTGTATAAGAGACAG  |  |  |  | CGTCAGCA       | P7_0002       | CAAGCAGAAGACGGCATAACGAGAT <b>CGCTACGGC</b> GTCTCGTGGGCTCGGAGATGTGTATAAGAGACAG  |  |  | CGCTACGG       |
| P5_0003                                                                                                                                                                                                    | AATGATACGGCACCACCGAGATCTACAC <b>AGCGTCGAT</b> CGTCGGCAGCGTCAGATGTGTATAAGAGACAG  |  |  |  | AGCGTCGA       | P7_0003       | CAAGCAGAAGACGGCATAACGAGAT <b>TCTCAGTA</b> GTCTCGTGGGCTCGGAGATGTGTATAAGAGACAG   |  |  | TACTGAGA       |
| P5_0004                                                                                                                                                                                                    | AATGATACGGCACCACCGAGATCTACAC <b>CATATGTAT</b> CTCGCGCAGCGTCAGATGTGTATAAGAGACAG  |  |  |  | CATATGTA       | P7_0005       | CAAGCAGAAGACGGCATAACGAGAT <b>ACGAGCAG</b> GTCTCGTGGGCTCGGAGATGTGTATAAGAGACAG   |  |  | CTGCTCGT       |
| P5_0005                                                                                                                                                                                                    | AATGATACGGCACCACCGAGATCTACAC <b>CAGACAGAT</b> CGTCGGCAGCGTCAGATGTGTATAAGAGACAG  |  |  |  | CAGACAGA       | P7_0006       | CAAGCAGAAGACGGCATAACGAGAT <b>ATACGTGAGT</b> GTCTCGTGGGCTCGGAGATGTGTATAAGAGACAG |  |  | TCACGTAT       |
| P5_0007                                                                                                                                                                                                    | AATGATACGGCACCACCGAGATCTACAC <b>ACTCACAT</b> CTCGCGCAGCGTCAGATGTGTATAAGAGACAG   |  |  |  | ACTCACAT       | P7_0007       | CAAGCAGAAGACGGCATAACGAGAT <b>GCTACAG</b> GTCTCGTGGGCTCGGAGATGTGTATAAGAGACAG    |  |  | CTCTAGAC       |
| P5_0008                                                                                                                                                                                                    | AATGATACGGCACCACCGAGATCTACAC <b>CGCTCTAG</b> TCGTCGGCAGCGTCAGATGTGTATAAGAGACAG  |  |  |  | GCTCTAGT       | P7_0009       | CAAGCAGAAGACGGCATAACGAGAT <b>CTCACAG</b> AGTCTCGTGGGCTCGGAGATGTGTATAAGAGACAG   |  |  | TCGTGTAG       |
| P5_0009                                                                                                                                                                                                    | AATGATACGGCACCACCGAGATCTACAC <b>CGCCTCAT</b> TCGTCGGCAGCGTCAGATGTGTATAAGAGACAG  |  |  |  | GCGCTCAT       | P7_0010       | CAAGCAGAAGACGGCATAACGAGAT <b>AGACATAG</b> GTCTCGTGGGCTCGGAGATGTGTATAAGAGACAG   |  |  | TATGTGCT       |
| P5_0010                                                                                                                                                                                                    | AATGATACGGCACCACCGAGATCTACAC <b>CAGAGTAGAT</b> CGTCGGCAGCGTCAGATGTGTATAAGAGACAG |  |  |  | AGAGTAGA       | P7_0012       | CAAGCAGAAGACGGCATAACGAGAT <b>TGATAGAG</b> GTCTCGTGGGCTCGGAGATGTGTATAAGAGACAG   |  |  | CTCTATCA       |
| P5_0011                                                                                                                                                                                                    | AATGATACGGCACCACCGAGATCTACAC <b>TATGAGCAT</b> CGTCGGCAGCGTCAGATGTGTATAAGAGACAG  |  |  |  | TATGAGCA       | P7_0013       | CAAGCAGAAGACGGCATAACGAGAT <b>GACGACTG</b> GTCTCGTGGGCTCGGAGATGTGTATAAGAGACAG   |  |  | CAGTCGTC       |
| P5_0012                                                                                                                                                                                                    | AATGATACGGCACCACCGAGATCTACAC <b>CACTGATTCT</b> CGCGCAGCGTCAGATGTGTATAAGAGACAG   |  |  |  | TCACTGAT       | P7_0014       | CAAGCAGAAGACGGCATAACGAGAT <b>TGTGCTAG</b> TCGTCGGGCTCGGAGATGTGTATAAGAGACAG     |  |  | TGAGCACA       |
| P5_0013                                                                                                                                                                                                    | AATGATACGGCACCACCGAGATCTACAC <b>CTGACAGT</b> TCGTCGGCAGCGTCAGATGTGTATAAGAGACAG  |  |  |  | CTGACAGT       | P7_0018       | CAAGCAGAAGACGGCATAACGAGAT <b>CTGTCGAG</b> GTCTCGTGGGCTCGGAGATGTGTATAAGAGACAG   |  |  | TCGTGAGA       |
| P5_0014                                                                                                                                                                                                    | AATGATACGGCACCACCGAGATCTACAC <b>CGCGAGCTAT</b> CTCGTCGAGCGTCAGATGTGTATAAGAGACAG |  |  |  | GCGAGCTA       | P7_0002A      | CAAGCAGAAGACGGCATAACGAGAT <b>TGATATAT</b> GTCTCGTGGGCTCGGAGATGTGTATAAGAGACAG   |  |  | GATATCAT       |
| P5_0015                                                                                                                                                                                                    | AATGATACGGCACCACCGAGATCTACAC <b>CATATCTG</b> TCGTCGGCAGCGTCAGATGTGTATAAGAGACAG  |  |  |  | CATATCGT       | P7_0003A      | CAAGCAGAAGACGGCATAACGAGAT <b>GTATCTAG</b> GTCTCGTGGGCTCGGAGATGTGTATAAGAGACAG   |  |  | CTAGATAC       |
| P5_0016                                                                                                                                                                                                    | AATGATACGGCACCACCGAGATCTACAC <b>TCAGCAGT</b> TCGTCGGCAGCGTCAGATGTGTATAAGAGACAG  |  |  |  | TCAGCAGT       | P7_0005A      | CAAGCAGAAGACGGCATAACGAGAT <b>ATCTAGAG</b> GTCTCGTGGGCTCGGAGATGTGTATAAGAGACAG   |  |  | CTCTAGAT       |
| P5_0017                                                                                                                                                                                                    | AATGATACGGCACCACCGAGATCTACAC <b>CAGATGTG</b> TCGTCGGCAGCGTCAGATGTGTATAAGAGACAG  |  |  |  | GACATGTG       | P7_0006A      | CAAGCAGAAGACGGCATAACGAGAT <b>GCTCTATAG</b> GTCTCGTGGGCTCGGAGATGTGTATAAGAGACAG  |  |  | TATAGACG       |
| P5_0018                                                                                                                                                                                                    | AATGATACGGCACCACCGAGATCTACAC <b>TGTATGAG</b> TCGTCGGCAGCGTCAGATGTGTATAAGAGACAG  |  |  |  | TGTATGAG       | P7_0007A      | CAAGCAGAAGACGGCATAACGAGAT <b>AGTGTAGT</b> GTCTCGTGGGCTCGGAGATGTGTATAAGAGACAG   |  |  | TACATACT       |
| P5_0019                                                                                                                                                                                                    | AATGATACGGCACCACCGAGATCTACAC <b>CAGATCAG</b> TCGTCGGCAGCGTCAGATGTGTATAAGAGACAG  |  |  |  | CAGATCAG       | P7_0008A      | CAAGCAGAAGACGGCATAACGAGAT <b>GACTACAG</b> GTCTCGTGGGCTCGGAGATGTGTATAAGAGACAG   |  |  | CTGTAGTC       |
| P5_0003A                                                                                                                                                                                                   | AATGATACGGCACCACCGAGATCTACAC <b>TGCTACATG</b> TCGTCGGCAGCGTCAGATGTGTATAAGAGACAG |  |  |  | TGCTATAG       | P7_0009A      | CAAGCAGAAGACGGCATAACGAGAT <b>ATAGCTGT</b> GTCTCGTGGGCTCGGAGATGTGTATAAGAGACAG   |  |  | CAGCTCAT       |
| P5_0006A                                                                                                                                                                                                   | AATGATACGGCACCACCGAGATCTACAC <b>CTAGCTCT</b> CTCGCGCAGCGTCAGATGTGTATAAGAGACAG   |  |  |  | TGAGTCTA       | P7_0010A      | CAAGCAGAAGACGGCATAACGAGAT <b>ATAGACAG</b> GTCTCGTGGGCTCGGAGATGTGTATAAGAGACAG   |  |  | GTCTATCT       |
| P5_0007A                                                                                                                                                                                                   | AATGATACGGCACCACCGAGATCTACAC <b>CAGTACAGT</b> TCGTCGGCAGCGTCAGATGTGTATAAGAGACAG |  |  |  | GAGTACAG       | P7_0011A      | CAAGCAGAAGACGGCATAACGAGAT <b>CTGTCGAG</b> GTCTCGTGGGCTCGGAGATGTGTATAAGAGACAG   |  |  | CTGTATAG       |
| P5_0008A                                                                                                                                                                                                   | AATGATACGGCACCACCGAGATCTACAC <b>TATACTG</b> TCGTCGGCAGCGTCAGATGTGTATAAGAGACAG   |  |  |  | TATACTGA       | P7_0012A      | CAAGCAGAAGACGGCATAACGAGAT <b>TAGATGTAG</b> GTCTCGTGGGCTCGGAGATGTGTATAAGAGACAG  |  |  | TACTACTA       |
| P5_0010A                                                                                                                                                                                                   | AATGATACGGCACCACCGAGATCTACAC <b>CTAGTACT</b> CTCGCGCAGCGTCAGATGTGTATAAGAGACAG   |  |  |  | CATGTACA       | P7_0013A      | CAAGCAGAAGACGGCATAACGAGAT <b>GAGACATAG</b> GTCTCGTGGGCTCGGAGATGTGTATAAGAGACAG  |  |  | TATGTTCT       |
| P5_0011A                                                                                                                                                                                                   | AATGATACGGCACCACCGAGATCTACAC <b>TACTCGCT</b> TCGTCGGCAGCGTCAGATGTGTATAAGAGACAG  |  |  |  | TACTCGCT       | P7_0014A      | CAAGCAGAAGACGGCATAACGAGAT <b>AGAGTAGG</b> GTCTCGTGGGCTCGGAGATGTGTATAAGAGACAG   |  |  | CTCACTCT       |
| P5_0012A                                                                                                                                                                                                   | AATGATACGGCACCACCGAGATCTACAC <b>CAGTGTG</b> TCGTCGGCAGCGTCAGATGTGTATAAGAGACAG   |  |  |  | CAGTGTGT       | P7_0016A      | CAAGCAGAAGACGGCATAACGAGAT <b>AGACTATAG</b> GTCTCGTGGGCTCGGAGATGTGTATAAGAGACAG  |  |  | TATAGTCT       |
| P5_0013A                                                                                                                                                                                                   | AATGATACGGCACCACCGAGATCTACAC <b>TATGTAGT</b> TCGTCGGCAGCGTCAGATGTGTATAAGAGACAG  |  |  |  | TATGTAGT       | P7_0019A      | CAAGCAGAAGACGGCATAACGAGAT <b>AGCTGATAG</b> GTCTCGTGGGCTCGGAGATGTGTATAAGAGACAG  |  |  | TCTCAGCT       |
| P5_0014A                                                                                                                                                                                                   | AATGATACGGCACCACCGAGATCTACAC <b>CTGAGATG</b> TCGTCGGCAGCGTCAGATGTGTATAAGAGACAG  |  |  |  | GTGAGATG       | P7_0022A      | CAAGCAGAAGACGGCATAACGAGAT <b>TGTATGAGT</b> GTCTCGTGGGCTCGGAGATGTGTATAAGAGACAG  |  |  | TCATCAT        |
| P5_0015A                                                                                                                                                                                                   | AATGATACGGCACCACCGAGATCTACAC <b>TAGACTAG</b> TCGTCGGCAGCGTCAGATGTGTATAAGAGACAG  |  |  |  | TAGACTAG       | P7_0024A      | CAAGCAGAAGACGGCATAACGAGAT <b>TCTGATAGT</b> GTCTCGTGGGCTCGGAGATGTGTATAAGAGACAG  |  |  | CTATCAGA       |
| P5_0016A                                                                                                                                                                                                   | AATGATACGGCACCACCGAGATCTACAC <b>GTGTACGT</b> TCGTCGGCAGCGTCAGATGTGTATAAGAGACAG  |  |  |  | GTGTACGT       | P7_0030A      | CAAGCAGAAGACGGCATAACGAGAT <b>CGTATGAG</b> GTCTCGTGGGCTCGGAGATGTGTATAAGAGACAG   |  |  | CTCATACG       |
| P5_0018A                                                                                                                                                                                                   | AATGATACGGCACCACCGAGATCTACAC <b>TGAGCTAT</b> TCGTCGGCAGCGTCAGATGTGTATAAGAGACAG  |  |  |  | TGAGCTAT       | P7_0036A      | CAAGCAGAAGACGGCATAACGAGAT <b>GTCATATAG</b> GTCTCGTGGGCTCGGAGATGTGTATAAGAGACAG  |  |  | TATATGAC       |
| P5_0019A                                                                                                                                                                                                   | AATGATACGGCACCACCGAGATCTACAC <b>CAGCTGTA</b> TCGTCGGCAGCGTCAGATGTGTATAAGAGACAG  |  |  |  | CAGCTGTA       | P7_0040A      | CAAGCAGAAGACGGCATAACGAGAT <b>GCAGAGAG</b> GTCTCGTGGGCTCGGAGATGTGTATAAGAGACAG   |  |  | CTCTCTGC       |
| P5_0020A                                                                                                                                                                                                   | AATGATACGGCACCACCGAGATCTACAC <b>CACGAGAG</b> TCGTCGGCAGCGTCAGATGTGTATAAGAGACAG  |  |  |  | CACGAGAG       | P7_0041A      | CAAGCAGAAGACGGCATAACGAGAT <b>GATGAGAG</b> GTCTCGTGGGCTCGGAGATGTGTATAAGAGACAG   |  |  | TCTCATGC       |
| P5_0021A                                                                                                                                                                                                   | AATGATACGGCACCACCGAGATCTACAC <b>CAGTGATA</b> TCGTCGGCAGCGTCAGATGTGTATAAGAGACAG  |  |  |  | CAGTGATA       | P7_0042A      | CAAGCAGAAGACGGCATAACGAGAT <b>GATGTGAG</b> GTCTCGTGGGCTCGGAGATGTGTATAAGAGACAG   |  |  | CTCACATC       |
| P5_0022A                                                                                                                                                                                                   | AATGATACGGCACCACCGAGATCTACAC <b>CGCTATAT</b> TCGTCGGCAGCGTCAGATGTGTATAAGAGACAG  |  |  |  | GCGTATAT       | P7_0047A      | CAAGCAGAAGACGGCATAACGAGAT <b>CAGTGTAG</b> GTCTCGTGGGCTCGGAGATGTGTATAAGAGACAG   |  |  | TATCACTG       |
| P5_0023A                                                                                                                                                                                                   | AATGATACGGCACCACCGAGATCTACAC <b>GATCAGCA</b> TCGTCGGCAGCGTCAGATGTGTATAAGAGACAG  |  |  |  | GATCAGCA       | P7_0048A      | CAAGCAGAAGACGGCATAACGAGAT <b>CTCATAG</b> GTCTCGTGGGCTCGGAGATGTGTATAAGAGACAG    |  |  | CTATCAG        |
| P5_0025A                                                                                                                                                                                                   | AATGATACGGCACCACCGAGATCTACAC <b>ACACTCAG</b> TCGTCGGCAGCGTCAGATGTGTATAAGAGACAG  |  |  |  | ACACTCAG       | P7_0050A      | CAAGCAGAAGACGGCATAACGAGAT <b>GATGATAG</b> GTCTCGTGGGCTCGGAGATGTGTATAAGAGACAG   |  |  | CTACTATC       |
| P5_0026A                                                                                                                                                                                                   | AATGATACGGCACCACCGAGATCTACAC <b>TCATCTAT</b> TCGTCGGCAGCGTCAGATGTGTATAAGAGACAG  |  |  |  | TCACTATA       | P7_0055A      | CAAGCAGAAGACGGCATAACGAGAT <b>ACGTACAG</b> GTCTCGTGGGCTCGGAGATGTGTATAAGAGACAG   |  |  | GTGTACGT       |
| P5_0029A                                                                                                                                                                                                   | AATGATACGGCACCACCGAGATCTACAC <b>CGCAGATAT</b> TCGTCGGCAGCGTCAGATGTGTATAAGAGACAG |  |  |  | GCGCATA        | P7_0056A      | CAAGCAGAAGACGGCATAACGAGAT <b>TACTGATAG</b> GTCTCGTGGGCTCGGAGATGTGTATAAGAGACAG  |  |  | TCTACGTA       |
| P5_0030A                                                                                                                                                                                                   | AATGATACGGCACCACCGAGATCTACAC <b>CTATGTAG</b> TCGTCGGCAGCGTCAGATGTGTATAAGAGACAG  |  |  |  | CTATGTAG       | P7_0068A      | CAAGCAGAAGACGGCATAACGAGAT <b>TGCTACAG</b> GTCTCGTGGGCTCGGAGATGTGTATAAGAGACAG   |  |  | TCGTAGCA       |
| P5_0031A                                                                                                                                                                                                   | AATGATACGGCACCACCGAGATCTACAC <b>CTGCTCGT</b> TCGTCGGCAGCGTCAGATGTGTATAAGAGACAG  |  |  |  | CTGCTCGT       | P7_0073A      | CAAGCAGAAGACGGCATAACGAGAT <b>ATGACAG</b> GTCTCGTGGGCTCGGAGATGTGTATAAGAGACAG    |  |  | CTGTCAT        |
| P5_0032A                                                                                                                                                                                                   | AATGATACGGCACCACCGAGATCTACAC <b>GTAGTGCT</b> TCGTCGGCAGCGTCAGATGTGTATAAGAGACAG  |  |  |  | GTAGTGCT       | P7_0074A      | CAAGCAGAAGACGGCATAACGAGAT <b>TGAGACAG</b> GTCTCGTGGGCTCGGAGATGTGTATAAGAGACAG   |  |  | CTGTCTCA       |
| P5_0033A                                                                                                                                                                                                   | AATGATACGGCACCACCGAGATCTACAC <b>ATGATAGT</b> TCGTCGGCAGCGTCAGATGTGTATAAGAGACAG  |  |  |  | ATGATAGT       | P7_0078A      | CAAGCAGAAGACGGCATAACGAGAT <b>ACTCATGAG</b> GTCTCGTGGGCTCGGAGATGTGTATAAGAGACAG  |  |  | TCATGAGT       |
| P5_0034A                                                                                                                                                                                                   | AATGATACGGCACCACCGAGATCTACAC <b>AGCAGACT</b> TCGTCGGCAGCGTCAGATGTGTATAAGAGACAG  |  |  |  | AGCAGACT       | P7_0086A      | CAAGCAGAAGACGGCATAACGAGAT <b>ACGATGAG</b> GTCTCGTGGGCTCGGAGATGTGTATAAGAGACAG   |  |  | TCGTGCTG       |
| P5_0036A                                                                                                                                                                                                   | AATGATACGGCACCACCGAGATCTACAC <b>TCGACGTAT</b> CTCGCAGCGTCAGATGTGTATAAGAGACAG    |  |  |  | TGCAGCTA       | P7_0091A      | CAAGCAGAAGACGGCATAACGAGAT <b>GAGTCAG</b> GTCTCGTGGGCTCGGAGATGTGTATAAGAGACAG    |  |  | TACGTCGT       |
| P5_0037A                                                                                                                                                                                                   | AATGATACGGCACCACCGAGATCTACAC <b>CAGCAGCT</b> TCGTCGGCAGCGTCAGATGTGTATAAGAGACAG  |  |  |  | GACAGCGT       | P7_0094A      | CAAGCAGAAGACGGCATAACGAGAT <b>GACGTCTG</b> GTCTCGTGGGCTCGGAGATGTGTATAAGAGACAG   |  |  | TAGACGTC       |
| P5_0039A                                                                                                                                                                                                   | AATGATACGGCACCACCGAGATCTACAC <b>CGCAGTGA</b> TCGTCGGCAGCGTCAGATGTGTATAAGAGACAG  |  |  |  | CGCAGTGA       | P7_0095A      | CAAGCAGAAGACGGCATAACGAGAT <b>CACGTAGT</b> GTCTCGTGGGCTCGGAGATGTGTATAAGAGACAG   |  |  | CTACAGTG       |
| P5_0040A                                                                                                                                                                                                   | AATGATACGGCACCACCGAGATCTACAC <b>CAGATGTG</b> TCGTCGGCAGCGTCAGATGTGTATAAGAGACAG  |  |  |  | TCAGATGT       | P7_0097A      | CAAGCAGAAGACGGCATAACGAGAT <b>GATCATG</b> GTCTCGTGGGCTCGGAGATGTGTATAAGAGACAG    |  |  | TATGATAC       |
| P5_0042A                                                                                                                                                                                                   | AATGATACGGCACCACCGAGATCTACAC <b>CGAGACGAT</b> TCGTCGGCAGCGTCAGATGTGTATAAGAGACAG |  |  |  | CGAGACGA       | P7_0100A      | CAAGCAGAAGACGGCATAACGAGAT <b>CAGATCAG</b> GTCTCGTGGGCTCGGAGATGTGTATAAGAGACAG   |  |  | CTGATCTG       |
| P5_0049A                                                                                                                                                                                                   | AATGATACGGCACCACCGAGATCTACAC <b>GTGAGTGT</b> TCGTCGGCAGCGTCAGATGTGTATAAGAGACAG  |  |  |  | GTGAGTGT       | P7_0102A      | CAAGCAGAAGACGGCATAACGAGAT <b>AGCGACG</b> GTCTCGTGGGCTCGGAGATGTGTATAAGAGACAG    |  |  | CGCTGCTG       |
| P5_0050A                                                                                                                                                                                                   | AATGATACGGCACCACCGAGATCTACAC <b>GATGCACT</b> TCGTCGGCAGCGTCAGATGTGTATAAGAGACAG  |  |  |  | GATGCACT       | P7_0103A      | CAAGCAGAAGACGGCATAACGAGAT <b>GAGATCAG</b> GTCTCGTGGGCTCGGAGATGTGTATAAGAGACAG   |  |  | TGATCTGC       |

| GRAS-Di markers |             |                  |       |
|-----------------|-------------|------------------|-------|
|                 | SNP markers | Amplicon markers | Total |
| RIL71           | 495         | 555              | 1050  |
| RIL98           | 499         | 786              | 1285  |
| RIL16           | 593         | 1115             | 1708  |
| RIL91           | 635         | 1069             | 1704  |

**Figure S2.** Total number of markers generated by GRAS-Di

| RIL71                            |                | GoldenGate |       |     |       |
|----------------------------------|----------------|------------|-------|-----|-------|
|                                  |                | A          | B     | -   | total |
| GRAS-Di SNP+<br>Amplicon markers | A              | 11080      | 18    | 14  | 11112 |
|                                  | B              | 28         | 10995 | 46  | 11069 |
|                                  | -              | 8          | 5     | 606 | 619   |
|                                  | total          | 11116      | 11018 | 666 | 22121 |
| corresponding ratio              | 0.997920528005 |            |       |     |       |

| RIL98                            |                | GoldenGate |      |     |       |
|----------------------------------|----------------|------------|------|-----|-------|
|                                  |                | A          | B    | -   | total |
| GRAS-Di SNP+<br>Amplicon markers | A              | 7291       | 11   | 14  | 7316  |
|                                  | B              | 11         | 7480 | 3   | 7494  |
|                                  | -              | 22         | 9    | 423 | 454   |
|                                  | total          | 7324       | 7500 | 440 | 14793 |
| corresponding ratio              | 0.998512810113 |            |      |     |       |

| RIL 16                           |                | GoldenGate |       |     |       |
|----------------------------------|----------------|------------|-------|-----|-------|
|                                  |                | A          | B     | -   | total |
| GRAS-Di SNP+<br>Amplicon markers | A              | 9150       | 21    | 41  | 9212  |
|                                  | B              | 15         | 10574 | 13  | 10602 |
|                                  | -              | 11         | 31    | 569 | 611   |
|                                  | total          | 9176       | 10626 | 623 | 19760 |
| corresponding ratio              | 0.998178137652 |            |       |     |       |

| RIL91                            |                | GoldenGate |       |      |       |
|----------------------------------|----------------|------------|-------|------|-------|
|                                  |                | A          | B     | -    | total |
| GRAS-Di SNP+<br>Amplicon markers | A              | 10397      | 13    | 32   | 10442 |
|                                  | B              | 11         | 11214 | 18   | 11243 |
|                                  | -              | 6          | 8     | 1613 | 1627  |
|                                  | total          | 10414      | 11235 | 1663 | 21635 |
| corresponding ratio              | 0.998890686388 |            |       |      |       |

**Figure S3.** Example of calculation of correspondence ratio between makers generated by GoldenGate method and markers generated by GRAS-Di technology
